# Supplementary material
Source: MDPI journal article supplement (https://www.mdpi.com/2673-6284/13/1/2)
Supplement: s1 [file s1]

## Supplementary information

### Sequence of AtPAL2:

ATGGATCAGATTGAAGCAATGCTGTGTGGTGGTGGTGAAAAACCAAAGTTGCAGTT  
ACCACCAAACACTGGCAGATCCGCTGAATTGGGGTTTAGCAGCAGATCAGATGAAA  
GGTAGCCATCTGGATGAAGTGAAAAAATGGTGGAAGAATATCGTCGTCCGGTGGTT  
AATTTAGGTGGCGAAACCCTGACCATTGGCCAGGTTGCAGCAATTAGCACCGTTGGT  
GGTAGCGTTAAAGTTGAACTGGCAGAAACCAGCCGTGCCGGTGTTAAAGCAAGCAG  
CGATTGGGTTATGGAAAGCATGAATAAAGGCACCGATAGTTATGGTGTTACCACCGGT  
TTTGGTGCAACCAGCCATCGTCGTACCAAAAATGGCACCGCACTGCAGACCGAACTG  
ATTCGTTTTCTGAATGCAGGTATTTTCGGCAACACCAAAGAAACCTGTCATACCCTGC  
CGCAGAGCGCAACCCGTGCAGCCATGCTGGTTCGTGTTAATACTGCTGCAGGGTT  
ATAGCGGTATTCGTTTTGAAATTCTGGAAGCAATTACCAGCCTGCTGAATCATAACATT  
AGCCCGAGCCTGCCGCTGCGTGGCACCATTACCGCAAGCGGTGATCTGGTTCCGCTG  
AGCTATATTGCAGGTCTGCTGACCGGTCGTCCGAATAGCAAAGCAACCGGTCCGGAT  
GGTGAAAGCCTGACCGCAAAAGAAGCATTTGAAAAAGCAGGTATTAGCACGGGCTT  
TTTTGATCTGCAGCCGAAAGAAGGTCTGGCACTGGTTAATGGTACAGCAGTTGGTAG  
CGGTATGGCAAGCATGGTTCTGTTTGAAGCAAATGTTTCAGGCAGTTCTGGCAGAAGT  
TCTGAGCGCAATTTTTGCCGAAGTTATGAGCGGTAAACCGGAATTTACCGATCATCTG  
ACCCATCGTCTGAAACATCATCCGGGTCAGATCGAAGCAGCAGCCATTATGGAACATA  
TTCTGGATGGTAGCAGCTATATGAAACTGGCACAGAAAGTTCATGAAATGGATCCGCT  
GCAGAAACCGAAACAGGATCGTTATGCACTGCGTACCAGTCCGCAGTGGCTGGGTCC  
GCAGATTGAGGTTATTCGTCAGGCAACCAAAAGCATTGAACGTGAAATTAACAGCGT  
GAATGATAACCCGCTGATTGATGTTAGCCGTAATAAAGCAATTCACGGTGGTAATTTTC

AGGGCACCCCGATTGGTGTAGCATGGATAATACCCGTCTGGCAATTGCAGCCATTGG  
TAAACTGATGTTTGCACAGTTTAGCGAACTGGTGAACGATTTCTATAATAACGGTCTG  
CCGAGCAATCTGACCGCCAGCAGCAATCCGAGCCTGGATTATGGTTTTAAAGGTGCA  
GAAATTGCAATGGCCAGCTATTGCAGCGAACTGCAGTATCTGGCAAATCCGGTTACCA  
GCCATGTTTCAGAGCGCAGAACAGCATAATCAGGATGTTAATAGCCTGGGTCTGATTAG  
CAGCCGTAAAACCAGCGAAGCAGTTGATATTCTGAAACTGATGAGCACCACCTTTCT  
GGTTGGTATTTGTCAGGCCGTTGATCTGCGTCATCTGGAAGAAAATCTGCGCCAGACC  
GTGAAAAATACCGTTAGCCAGGTGGCAAAAAAAGTTCTGACCACCGGTATTAATGGT  
GAACTGCATCCGAGCCGTTTTTGTGAAAAAGATCTGCTGAAAGTTGTGGATCGTGAA  
CAGGTTTTTACCTATGTTGATGATCCGTGTAGCGCAACCTATCCGCTGATGCAGCGTCT  
GCGTCAGGTTATTGTTGATCATGCACTGAGCAATGGTGAAACCGAGAAAAATGCAGT  
GACCAGCATTTTTTCAGAAAATCGGTGCATTTGAAGAGGAACTGAAAGCAGTTCTGCC  
TAAAGAAGTTGAAGCAGCACGCGCAGCATATGGTAATGGTACGGCACCGATTCCGAA  
TCGTATTAAAGAATGTCGTAGTTATCCGCTGTATCGTTTTGTTTCGTGAAGAACTGGGCA  
CCAAACTGCTGACAGGTGAAAAAGTTGTTAGTCCGGGTGAAGAATTCGATAAAGTTT  
TTACCGCAATGTGCGAAGGCAAACCTGATTGATCCTCTGATGGATTGTCTGAAAGAATG  
GAATGGTGCCCCCTATTCCGATTTGTAA

**Sequence of BdPAL1:**

AAGGAGGAATAAAACCATGGCAGGTAATGGTGCAATCAGCGAAAAAGATCCGCTGAAT  
TGGGGTGCAGCAGCAGCCGAACTGACCGGTAGCCATCTGGATGAAGTTAAACGTATG  
GTTGCACAGTTTCGTGAACCGGTTGTTAAAATTGAAGGTGCAAGCCTGCGTGTTGGT  
CAGGTTGCAGCAGTTGCACAGGCCAAAAGATGCAGCCGGTGTTAGCGTTGAACTGGA  
CGAAGAAGCACGTCCCTCGCGTTAAAGCAAGCAGCGAATGGATTCTGAGCTGTCTGGC  
AGCAGGCGGTGATATTTATGGTGTTACCACCGGTTTTGGTGGCACCAGCCATCGTCGT  
ACCAAAGATGGTCCGGCACTGCAGGTTGAACTGCTGCGTCATCTGAATGCAGGTATTT  
TTGGCACCGGTAGTGATGGTCATAGCCTGCCTGCCGAAGTTACCCGTGCAGCAATGCT  
GGTTCGCATTAATACCCTGCTGCAGGGCTATAGCGGTATTCGTTTTGAAATTCTGGAAG  
CCATTACCAAACCTGCTGAATACCGGTGTGAGCCCGTGTCTGCCGCTGCGTGGTACAAT  
TACCGCAAGCGGTGATCTGGTTCCGCTGAGCTATATTGCAGGTCTGATTACCGGTCTG  
CCGAATGCACAGGCCACCACCGCAGATGGTCGTAAAGTTGATGCAGCAGAAGCATTT  
AAAGTTGCCGGTATTGAAGGCGGTTTTTTTACCCTGAATCCGAAAGAAGGTCTGGCA  
ATTGTTAATGGTACAAGCGTTGGTAGCGCACTGGCAGCAACCGTTCTGTTTGATTGTA  
ATGTTCTGGCAGTTCTGAGCGAAGTGCTGAGCGCAGTTTTTTTGTGAAGTTATGAATGG  
CAAACCGGAATTCACCGATCATCTGACCCATAAACTGAAACATCATCCGGGTAGCATT  
GAAGCAGCAGCAATTATGGAACATATTCTGGCAGGTAGCAGCTTTATGAGCCATGCCA  
AAAAAGTGAATGAAATTGATCCGCAGCTGAAACCGAAACAGGATCGTTATGCACTGC  
GTACCAGTCCGCAGTGGCTGGGTCCGCAGATTGAAGTTATTCGTAGCGCAACCAAAA  
GCATTGAACGTGAAGTTAATAGCGTGAATGATAACCCGGTTATTGATGTGCATCGTGG  
TAAAGCACTGCATGGTGGTAATTTTCAGGGCACCCCGATTGGTGTTAGCATGGATAAT  
ACCCGTCTGGCCATTGCAAATATTGGCAAACCTGATGTTTGCCCAGTTTAGCGAACTGG

TGAATGAGTTTTATAACAATGGTCTGACCAGCAATCTGGCAGGCAGCCGTAATCCGAG  
CCTGGATTATGGTTTTAAAGGCACCGAAATTGCCATGGCCAGCTATTGCAGCGAACTG  
CAGTATCTGGCAAATCCGGTTACCAATCATGTTTCAGAGCGCAGAACAGCATAATCAGG  
ATGTTAATAGCCTGGGTTTTAGTTAGCGCACGTAAAACCGCAGAAAGCAGTTGATATTCT  
GAAACTGATGAGCAGCACCTATATGGTTGCCCTGTGTCAGGCAGTTGATCTGCGTCAC  
CTGGAAGAAAACATTAAAGCCAGCGTGAAAAATTGCGTTACCCAGGTTAGCAAAAA  
AGTCCTGACCATGAATCCGACAGGTGATCTGAGCAGCGCACGTTTTAGCGAAAAATC  
ACTGCTGACCGCAATTGATCGTGAAGCAGTTTTTAGCTATGCAGATGATGCATGTAGC  
GCAAATTATCCGCTGATGCAGAACTGCGTGCAGTTCTGGTTGATCATGCACTGACCA  
GCTCAGGTGTTGATAATGCCGGTGAAAGCGAAGCCACCGTTTTTAGCAAAATCAACA  
AATTCGAAGAGGAATTACGTGCAGCACTGCCTCGTGAAATTGAAGCCGCACGTGTTG  
CATTTGAAAAAGGTACAGCACCGATTCCGAACCTGATTAAAGATAGCCGTAGCTTTCC  
GCTGTATCGTTTTGTTCGTGAAGAACTGGGTTGTGTTTATCTGACCGGTGAGAACTG  
CTGTCACCGGGTGAAGAATGTAACAAAGTGTTTATTGGTATCAGCCAGGGTAAACTG  
ATTGATCCGATGCTGGAATGTCTGAAAGAATGGAATGGTGAACCGCTGCCGATTAATG  
TTGTTTAAGATCCGAGCTCGAGA

**Sequence of BdPAL2:**

TTGGAGGAATAAACCATGGAATGCGAAAATGGTCTGGTTGGTAGCCTGAATGGTGAA  
GGTCTGTGTATGAGCGCACCGCCTCGTGCAGCAGATCCGCTGAATTGGGCAAAAACC  
GCAGAAGAACTGGCAGGTAGCCATCTGGAAGAGGTGAAGTGAAAAATGGTTGCACA  
GTTTCGTATGCCGCTGGTTAAAATTGAAGGTGCAACCCTGGGTATTGCACAGGTTGCA  
GCAGTTGCAGCCGTGC@@@

**Sequence of BdPAL6:**

AAGGAGGAATAAACCATGGCCTGTGAAAATGGTCAGGTTGCAGCAAATGGTATTTGT  
ACCGCAATTCAGCATGCAGATCCGCTGAATTGGGGCAAAGCAGCAGAAGCACTGACC  
GGTAGCCATCTGGAAGAGGTTAAACGTATGGTTGCAGAATATCGTCAGCCGGTTGTTA  
CCATTGAAGGTGCAAGCCTGAGCATTGCAAAAGTTGCAGCAGTTGCCGCAGCCGGTG  
AAGCACAGGTTTCAGCTGGATGAAAGCGCACGTGAACGTGTTAAAGCAAGCAGCGAT  
TGGGTTATGGATAGCATGGCAAATGGTGTTGATAGCTATGGTGTTACCACCGGTTTTGG  
TGCAACCAGCCATCGTCGTACCAAAGAAGGTGGCGCACTGCAGCGTGAAC TGATTCTG  
TTTTCTGAATGCCGGTGCATTTGGCACCGGTAGTGATGGTCATGTTCTGCCTGCGGGT  
GCAACCCGTGCAGCAATGCTGGTTCGCATTAATACCCTGCTGCAGGGCTATAGCGGTA  
TTCGTTTTTGAAATTCTGGAAGCCATTGCCAAACTGCTGAATGCAAATGTTACCCCGTG  
TCTGCCGCTGCGTGGCACCATTACCGCAAGCGGTGATCTGGTTCCGCTGAGCTATATT  
GCAGGTCTGGTTACCGGTCGTGAAAATAGCGTTGCAGTTGCACCGGATGGTAGCAAA  
GTTAATGCAGCCGAAGCCTTTAAAATCGCAGGTATTCATGGTGGCTTTTTTTGAACTGC  
AGCCTAAAGAAGGTCTGGCAATGGTTAATGGCACCGCAGTTGGTAGCGGTCTGGCGA  
GCACCGTTCTGTTTGATGCCAATGTTCTGGCAGTTATGGCAGAAGTTATTAGCGCAGT  
TTTTTGCGAAGTGATGAATGGCAAACCGGAATTTACCGATCATCTGACCCATAAACTG  
AAACATCATCCGGGTCAGATTGAAGCAGCAGCAATTATGGAACATATCCTGGAAGGTA  
GCAGCTATATGAAACTGGCAAAAAAACTGGGCGATCTGGATCCTCTGATGAAACCGA  
AACAGGATCGTTATGCACTGCGTACCAGTCCGCAGTGGCTGGGTCCGCAGATCGAAG  
TTATTCGTGCAGCCACCAAAAAGCATTGAACGTGAAATTAACAGCGTGAATGACAACC  
CGCTGATTGATGTTAGCCGTGGTAAAGCAATTCATGGCGGTAATTTTCAGGGCACCCC  
GATTGGTGTTAGCATGGATAATACCCGTCTGGCACTGGCAGCAATTGGTAAACTGATG

TTTGACAGTTTAGCGAACTGGTGAACGATTTCTATAATAACGGTCTGCCGAGTAATC  
TGAGCGGTGGTCGTAATCCGAGCCTGGATTATGGTTTTAAAGGTGCAGAAATTGCAAT  
GGCCAGCTATTGCAGCGAGCTGCAGTTTCTGGGTAATCCGGTTACCAATCATGTTTCAG  
AGCGCAGAACAGCATAATCAGGATGTTAATAGCCTGGGTCTGATTAGCGCACGTAAAA  
CCGCAGAAGCAATTGAAATCCTGAAACTGATGACCAGCACCTTTCTGGTTGCCCTGT  
GTCAGGCAATTGATCTGCGTCATATTGAAGAAAATGTGAAAAGCGCAGTTACCAGCT  
GTGTTTCGTGCAGTTGCCAAAAAAACCCTGAGCACCAATAGTGCCGGTGGTCTGCATG  
TTGCCCCGTTTTAGCGAAAAAGATCTGATCCAAGAAATTGATCGTGAAGCCGTTTTTGC  
ATATGCCGATGATCCGTGTAATCCGAATTATCCGTTAATGAAAAAGCTGCGTGGTGTTC  
TGGTTGAACGTGCACTGGCCAATGGTGTGGCAGAATTTGATGCAGAAACCAGCGTTT  
TTGCCAAAGTTGCGCGTTTTGAAGAGGAACTGCGTGCAGCCCTGCCGGTTGCCGTTG  
AAGCCGCACGTGCAGCCGTTGAAAGCGGTACAGCGGAAGCACCGAATCGTATTGCC  
GAATGTCGTAGCTATCCGCTGTATCGTTTTGTTCGTCAAGAACTGGGCACCGTTTATCT  
GACCGGTGAAAAAACCCGTAGTCCGGGTGAAGAACTGAATAAAGTTCTGGTGGCAA  
TTAACCAGGGCAAACATATTGATCCGCTGCTGGAATGTCTGAAAGAATGGAATGGTG  
AACCGCTGCCGATTTGTTAAGATCCGAGCTCGAGA

**Sequence of BdPAL8:**

AAGGAGGAATAAACCATGGAATATGAAAATGGTCACGCAGCAACCTATGGTGATGGT  
CTGTGTGTTGCAGCACCGCTGGCACCGCGTGCAGATCCGCTGAATTGGGGTAAAGCA  
GCAGAAGAACTGAGCGGTAGCCATCTGGATGCAGTTAAACGTATGGTTGAAGAATAT  
CGTCGTCCGGTTGTAAAATGGAAGGTGCAAGCCTGACCATTGCACAGGTTGCAGCA  
GTTGCAGCCGGTGCCGAAGCACGTGTTGAACTGGATGAAAGCGCACGTGGTCGTGTT  
AAAGAAAGCAGCGATTGGGTTATGAATAGCATGATGAATGGCACCGATAGTTATGGTG  
TTACCACCGGTTTTGGTGCAACCAGCCATCGTCGTACCAAAGAAGGTGGCGCACTGC  
AGCGTGAAGTGAATTCGTTTTCTGAATGCCGGTGCATTTGGCACCGGTGAAGATGGTCA  
TGTTCTGCCTGCAGCAGCAACCCGTGCAGCAATGCTGGTTCGTGTAAATACCCTGCTG  
CAAGGTTATAGCGGTATTCGTTTTGAAATCCTGGAAACCATTGCAACCCTGCTGAATG  
CAAATGTTACCCCGTGTCTGCCGCTGCGTGGCACCATACCAGCAAGCGGTGATCTGGT  
TCCGCTGAGCTATATTGCAGGTCTGGTTACCGGTCTGCCGAATAGCGTTGCAACCGCA  
CCGGATGGTCGTAAAGTTAATGCAGCCGAAGCCTTTAAAATCGCAGGTATTCAGCATG  
GCTTTTTTTGAACTGCAGCCTAAAGAAGGTCTGGCAATGGTTAATGGTACAGCAGTTG  
GTAGCGGTCTGGCCAGCATGGTTCTGTTTGAAGCAAATATTCTGGGTGTTCTGGCAGA  
AGTTCTGAGCGCAGTTTTTTGTGAAGTTATGAATGGTAAACCGGAATTCACCGATCAT  
CTGACCCATAAACTGAAACATCATCCGGGTCAGATTGAAGCAGCAGCCATTATGGAA  
CATATTCTGGAAGGTAGCAGCTATATGATGCTGGCAAAAAAACTGGGCGAACTGGATC  
CTCTGATGAAACCGAAACAGGATCGTTATGCACTGCGTACCAGTCCGCAGTGGCTGG  
GTCCGCAGATCGAAGTTATTCGTGCAGCCACCAAAAGCATTGAACGTGAAATTAACA  
GCGTGAATGACAACCCGCTGATTGATGTTAGCCGTGGTAAAGCAATTCATGGTGGTAA  
TTTTCAGGGCACCCCGATTGGTGTTAGCATGGATAATACCCGTCTGGCCATTGCAGCA

ATTGGTAAACTGATGTTTGCACAGTTTAGCGAACTGGTGAACGATTTCTATAATAACG  
GTCTGCCGAGCAATCTGAGCGGTGGTCGTAATCCGAGCCTGGATTATGGTTTTAAAGG  
TGCAGAAATTGCAATGGCGAGCTATTGCAGCGAGCTGCAGTTTCTGGGTAATCCGGTT  
ACCAATCATGTTTCAGAGCGCAGAACAGCATAATCAGGATGTTAATAGCCTGGGTCTGA  
TTAGCAGCCGTAAAACCGCAGAAGCAATTGATATTCTGAAACTGATGAGCAGCACCT  
TTCTGGTTGCCCTGTGTCAGGCAATTGATCTGCGTCATCTGGAAGAAAATGTTCTAG  
CGCAGTGAAAAATTGTGTGACCACCGTTGCACGTAAAACCCTGAGCACCAATGTGAA  
TGGTCATCTGCATAATGCACGCTTTTGTGAAAAAGATCTGCTGCTGACAATTGATCGT  
GAAGCAGTTTTTGCATATGCCGATGATCCGTGTAGCGCAAATTATCCGCTGATGCAGA  
AAATGCGTGCAGTTCTGGTTGAACATGCACTGGCAAATGGTGAAGCAGAACGTGATG  
TTGAAACCAGCGTTTTTGCCAAACCTGGCAGCATTTGAACAAGAACTGCGTGCCGTGC  
TGCCGAAAGAAGTTGAAGCCGCACGCGCAGCCGTTGAAAATGGCACAGCGACCAAA  
CAGAATCGTATTGCAGAATGTCGTAGCTATCCGCTGTATCGTTTTGTTCGTGAAGAACT  
GGGCACCGAATATCTGACCGGTGAAAAAACCCGTAGTCCGGGTGAAGAAGTGGATAA  
AGTTTTTGTGCAATGAACCAGGGCAAACATATTGATGCACTGCTGGAATGTCTGAAA  
GAATGGAATGGTGAACCGCTGCCGCTGTGTTAAGATCCGAGCTCGAGA

**Sequence of FDC1:**

CATATGGGAATTCGAAAAGAGGTATATATTAATGCGTAAACTGAATCCGGCACTGGAA  
TTTCGTGATTTTATTCAGGTTCTGAAAGATGAGGATGACCTGATTGAAATCACCGAAG  
AAATTGATCCGAATCTGGAAGTTGGTGCCATTATGCGTAAAGCATATGAAAGCCATCT  
GCCTGCACCGCTGTTTAAAAACCTGAAAGGTGCAAGCAAAGACCTGTTTAGCATTCT  
GGGTTGTCCGGCAGGTCTGCGTAGCAAAGAAAAAGGTGATCATGGTCGTATTGCCCA  
TCATCTGGGTTTAGATCCGAAAACCACCATCAAAGAGATCATCGATTATCTGCTGGAA  
TGCAAAGAGAAAGAACCGCTGCCTCCGATTACCGTTCCGGTTAGCAGCGCACCGTGT  
AAAACCCATATTCTGAGCGAAGAAAAAATCCATCTGCAGAGCCTGCCGACACCGTAT  
CTGCATGTTTCAGATGGTGGTAAATATCTGCAGACCTATGGTATGTGGATTCTGCAGAC  
ACCGGACAAAAAATGGACCAATTGGAGCATTGCACGTGGTATGGTTGTTGATGATAA  
ACATATTACCGGTCTGGTGATTAAACCGCAGCATATTCGTCAGATTGCAGATAGCTGGG  
CAGCAATTGGTAAAGCCAATGAAATTCCGTTTGCACTGTGTTTTGGTGTTCGCGCTGC  
AGCAATTCTGGTGAGCAGCATGCCGATTCCGGAAGGTGTTAGCGAAAGCGATTATGTT  
GGTGCGATTCTGGGTGAAAGCGTTCCGGTGGTTAAATGTGAAACCAATGATCTGATG  
GTTCCGGCAACCAGCGAAATGGTTTTTTGAAGGCACCCTGAGCCTGACCGATACACAT  
CTGGAAGGTCCGTTTGGTGAAATGCATGGTTATGTGTTTAAAAGCCAGGGTCATCCGT  
GTCCGCTGTATACCGTTAAAGCAATGAGCTATCGTGATAATGCAATTCTGCCGGTGAG  
CAATCCGGGTCTGTGTACCGATGAAACCCATACACTGATTGGTAGCCTGGTTGCCACC  
GAAGCAAAAGAACTGGCAATTGAAAGCGGTCTGCCGATTCTGGATGCATTTATGCCG  
TATGAAGCACAGGCACTGTGGCTGATTCTGAAAGTTGATCTGAAAGGACTGCAGGCA  
CTGAAAACCACACCGGAAGAATTTTGTAAGGAGTGGGCGATATCTACTTCCGTACC  
AAAGTTGGTTTTATCGTGATGAAATTATTCTGGTGGCCGATGATATCGACATCTTCAA

CTTTAAAGAAGTGATTTGGGCATACGTGACCCGTCATACACCGGTTGCAGATCAGATG  
GCATTTGATGATGTTACCAGCTTTCCGCTGGCACCGTTTGTTAGCCAGAGCAGCCGTA  
GCAAAACAATGAAAGGTGGCAAATGTGTGACCAACTGTATTTTTCGTCAGCAGTATG  
AACGCAGCTTCGATTATATCACCTGTAACTTTGAAAAGGGCTATCCGAAAGGTCTGGT  
GGATAAAGTTAATGAAAACGCTACGGCTATAAAATAATGGCTGTTTTGGCGG
